# Supplementary material for: Pollution Characteristics and Risk Assessment of Heavy Metals in the Sediments of the Inflow Rivers of Dianchi Lake, China
Source: MDPI journal article supplement (doi:10.3390/toxics12050322), 2024-04-29
Supplement: s1 [file s1]

Table S1. Values of  $r_{ij}$  and  $r_{ij}^2$  of lakes (reservoir) in China

| Parameter  | chl- <i>a</i> | TP     | TN     | SD     | COD <sub>Mn</sub> |
|------------|---------------|--------|--------|--------|-------------------|
| $r_{ij}$   | 1             | 0.84   | 0.82   | -0.83  | 0.83              |
| $r_{ij}^2$ | 1             | 0.7056 | 0.6724 | 0.6889 | 0.6889            |

Calculation formula for nutrient status index:

$$TLI(\text{chl-}a) = 10 \times (2.5 + 1.086 \ln \text{chl-}a) \quad (1)$$

$$TLI(\text{TP}) = 10 \times (9.436 + 1.624 \ln \text{TP}) \quad (2)$$

$$TLI(\text{TN}) = 10 \times (5.453 + 1.694 \ln \text{TN}) \quad (3)$$

$$TLI(\text{SD}) = 10 \times (5.118 - 1.94 \ln \text{SD}) \quad (4)$$

$$TLI(\text{COD}_{\text{Mn}}) = 10 \times (0.109 + 2.661 \ln \text{COD}_{\text{Mn}}) \quad (5)$$

In the Eq. (1) to Eq. (5), the unit of chl-*a* was  $\text{mg} \cdot \text{m}^{-3}$ , the unit of SD was m, the unit of TP, TN and COD<sub>Mn</sub> were  $\text{mg} \cdot \text{L}^{-1}$ .

Table S2. Grading value for nutrient status

| Value of $TLI_{\Sigma}$        | Grading          |
|--------------------------------|------------------|
| $TLI_{\Sigma} < 30$            | Oligotrophe      |
| $30 \leq TLI_{\Sigma} \leq 50$ | Mesotropher      |
| $TLI_{\Sigma} > 50$            | Eutropher        |
| $50 < TLI_{\Sigma} \leq 60$    | Light Eutropher  |
| $60 < TLI_{\Sigma} \leq 70$    | Middle Eutropher |
| $TLI_{\Sigma} > 70$            | Hyper Eutropher  |

Table S3. Grades and ranges of  $E_r^i$  and  $PERI$  (Hakanson, 1980)

| $E_r^i$                | Grades of $E_r^i$ for metal <i>i</i> | $PERI$                | Grades of $PERI$ |
|------------------------|--------------------------------------|-----------------------|------------------|
| $E_r^i < 40$           | Low risk                             | $PERI < 150$          | Low risk         |
| $40 \leq E_r^i < 80$   | Moderate risk                        | $150 \leq PERI < 300$ | Moderate risk    |
| $80 \leq E_r^i < 160$  | High risk                            | $300 \leq PERI < 600$ | High risk        |
| $160 \leq E_r^i < 320$ | Very high risk                       | $PERI \geq 600$       | Very high risk   |
| $E_r^i \geq 320$       | Extremely high risk                  |                       |                  |

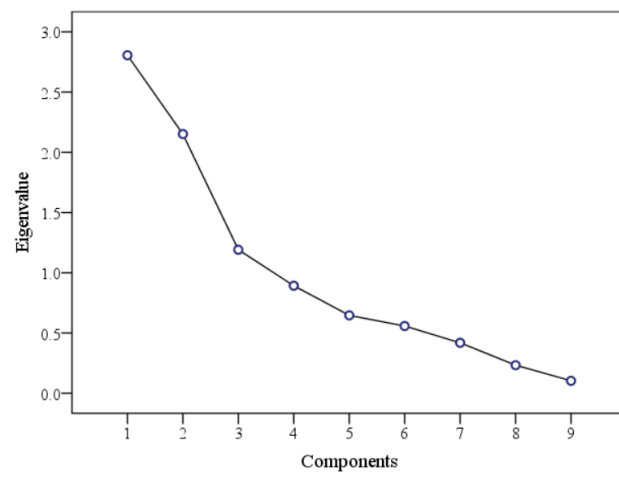

Figure S1. Eigenvalues for principal component analysis (PCA).
